# Supplementary material
Source: Springer Nature journal article supplement (https://www.springermedizin.de/resource/supplementary/12913_2012_2387_MOESM4_ESM.pdf/9530418)
Supplement: MOESM4 [file 9530418]

# Implementation

## Characteristics of the intervention

- Intervention source
- Evidence strength and quality
- Relative advantage
- Adaptability
- Trialability
- Complexity
- Design quality
- Cost

## Inner Setting

- Structural characteristics
- Networks and communications
- Culture
- Implementation climate

## Outer Setting

- Patient needs and resources
- Cosmopolitanism
- Peer pressure
- External policies and incentives

## Individuals involved

- Knowledge and beliefs about the intervention
- Self-efficacy
- Individual stage of change
- Individual identification with organisation
- Other personal attributes

## Implementation Process

- Planning
- Engaging
- Executing
- Reflecting and evaluating
